# Supplementary material
Source: PubMed Central journal article supplement (PMC6327021)
Supplement: 41437_2018_112_MOESM6_ESM.pdf [file 41437_2018_112_MOESM6_ESM.pdf]

TABLE S1. Summary of sheep used in this study.

| sample_name   | sample_accession | biosamples_id | sample_provider | species         | taxonomy_id | breed              | country        |
|---------------|------------------|---------------|-----------------|-----------------|-------------|--------------------|----------------|
| IROA-B2-5296  | ERS239046        | SAMEA2065588  | NEXTGEN         | Ovis aries      | 9940        | .                  | Iran           |
| IROA-B3-5134  | ERS239047        | SAMEA2065589  | NEXTGEN         | Ovis aries      | 9940        | .                  | Iran           |
| IROA-B4-5190  | ERS154865        | SAMEA2012929  | NEXTGEN         | Ovis aries      | 9940        | .                  | Iran           |
| IROA-B5-5295  | ERS154863        | SAMEA2012927  | NEXTGEN         | Ovis aries      | 9940        | .                  | Iran           |
| IROA-B6-5139  | ERS239048        | SAMEA2065590  | NEXTGEN         | Ovis aries      | 9940        | .                  | Iran           |
| IROA-C3-5212  | ERS154869        | SAMEA2012933  | NEXTGEN         | Ovis aries      | 9940        | .                  | Iran           |
| IROA-C6-5187  | ERS239049        | SAMEA2065591  | NEXTGEN         | Ovis aries      | 9940        | .                  | Iran           |
| IROA-C7-5042  | ERS239050        | SAMEA2065592  | NEXTGEN         | Ovis aries      | 9940        | .                  | Iran           |
| IROA-D5-5081  | ERS239051        | SAMEA2065593  | NEXTGEN         | Ovis aries      | 9940        | .                  | Iran           |
| IROA-D6-5152  | ERS154866        | SAMEA2012930  | NEXTGEN         | Ovis aries      | 9940        | .                  | Iran           |
| IROA-D7-5033  | ERS239052        | SAMEA2065594  | NEXTGEN         | Ovis aries      | 9940        | .                  | Iran           |
| IROA-E5-5157  | ERS239053        | SAMEA2065595  | NEXTGEN         | Ovis aries      | 9940        | .                  | Iran           |
| IROA-E6-5351  | ERS239054        | SAMEA2065596  | NEXTGEN         | Ovis aries      | 9940        | .                  | Iran           |
| IROA-E7-5036  | ERS239055        | SAMEA2065597  | NEXTGEN         | Ovis aries      | 9940        | .                  | Iran           |
| IROA-F10-5068 | ERS239056        | SAMEA2065598  | NEXTGEN         | Ovis aries      | 9940        | .                  | Iran           |
| IROA-F3-5142  | ERS154867        | SAMEA2012931  | NEXTGEN         | Ovis aries      | 9940        | .                  | Iran           |
| IROA-F5-5051  | ERS154868        | SAMEA2012932  | NEXTGEN         | Ovis aries      | 9940        | .                  | Iran           |
| IROA-G3-5095  | ERS239057        | SAMEA2065599  | NEXTGEN         | Ovis aries      | 9940        | .                  | Iran           |
| IROA-G4-5205  | ERS154862        | SAMEA2012926  | NEXTGEN         | Ovis aries      | 9940        | .                  | Iran           |
| IROO-C3-0001  | ERS154526        | SAMEA2012637  | NEXTGEN         | Ovis orientalis | 469796      | .                  | Iran           |
| IROO-D6-0002  | ERS154527        | SAMEA2012638  | NEXTGEN         | Ovis orientalis | 469796      | .                  | Iran           |
| IROO-D6-0005  | ERS154530        | SAMEA2012641  | NEXTGEN         | Ovis orientalis | 469796      | .                  | Iran           |
| IROO-E3-5492  | ERS154533        | SAMEA2012643  | NEXTGEN         | Ovis orientalis | 469796      | .                  | Iran           |
| IROO-E5-5146  | ERS154531        | SAMEA2012642  | NEXTGEN         | Ovis orientalis | 469796      | .                  | Iran           |
| IROO-J11-0602 | ERS239060        | SAMEA2065602  | NEXTGEN         | Ovis orientalis | 469796      | .                  | Iran           |
| IROO-J11-0905 | ERS239061        | SAMEA2065603  | NEXTGEN         | Ovis orientalis | 469796      | .                  | Iran           |
| IROO-K7-2301  | ERS419581        | SAMEA2395411  | NEXTGEN         | Ovis orientalis | 469796      | .                  | Iran           |
| IROO-K7-2303  | ERS419580        | SAMEA2395410  | NEXTGEN         | Ovis orientalis | 469796      | .                  | Iran           |
| IROO-M12-9997 | ERS239022        | SAMEA1964491  | NEXTGEN         | Ovis orientalis | 469796      | .                  | Iran           |
| IROO-N13-5061 | ERS239063        | SAMEA2065604  | NEXTGEN         | Ovis orientalis | 469796      | .                  | Iran           |
| IROV-AB8-1004 | ERS403315        | SAMEA2358289  | NEXTGEN         | Ovis vignei     | 59896       | .                  | Iran           |
| IROV-AB8-1005 | ERS403316        | SAMEA2358290  | NEXTGEN         | Ovis vignei     | 59896       | .                  | Iran           |
| IROV-AB8-1006 | ERS403317        | SAMEA2358291  | NEXTGEN         | Ovis vignei     | 59896       | .                  | Iran           |
| IROV-AD7-1002 | ERS403313        | SAMEA2358287  | NEXTGEN         | Ovis vignei     | 59896       | .                  | Iran           |
| MOOA-J17-1384 | ERS154709        | SAMEA2012231  | NEXTGEN         | Ovis aries      | 9940        | local populations  | Morocco        |
| MOOA-L15-0414 | ERS154724        | SAMEA2012246  | NEXTGEN         | Ovis aries      | 9940        | local populations  | Morocco        |
| MOOA-L19-1322 | ERS154726        | SAMEA2012248  | NEXTGEN         | Ovis aries      | 9940        | local populations  | Morocco        |
| MOOA-M17-1293 | ERS154734        | SAMEA2012324  | NEXTGEN         | Ovis aries      | 9940        | D'man              | Morocco        |
| MOOA-O11-0271 | ERS154746        | SAMEA2012336  | NEXTGEN         | Ovis aries      | 9940        | Sardi              | Morocco        |
| MOOA-O9-3220  | ERS154751        | SAMEA2012340  | NEXTGEN         | Ovis aries      | 9940        | local populations  | Morocco        |
| MOOA-Q12-0163 | ERS154764        | SAMEA2012431  | NEXTGEN         | Ovis aries      | 9940        | Sardi              | Morocco        |
| MOOA-R10-0005 | ERS154762        | SAMEA1967786  | NEXTGEN         | Ovis aries      | 9940        | Boujaad            | Morocco        |
| MOOA-R5-0027  | ERS154776        | SAMEA2012442  | NEXTGEN         | Ovis aries      | 9940        | local populations  | Morocco        |
| MOOA-S11-0138 | ERS154782        | SAMEA2012524  | NEXTGEN         | Ovis aries      | 9940        | Timahdite          | Morocco        |
| MOOA-T10-0238 | ERS154797        | SAMEA2012537  | NEXTGEN         | Ovis aries      | 9940        | Timahdite          | Morocco        |
| MOOA-T5-0041  | ERS154802        | SAMEA2012589  | NEXTGEN         | Ovis aries      | 9940        | local populations  | Morocco        |
| MOOA-T7-3100  | ERS154805        | SAMEA2012592  | NEXTGEN         | Ovis aries      | 9940        | local populations  | Morocco        |
| MOOA-U10-0242 | ERS154810        | SAMEA2012596  | NEXTGEN         | Ovis aries      | 9940        | local populations  | Morocco        |
| MOOA-U11-1027 | ERS154811        | SAMEA2012597  | NEXTGEN         | Ovis aries      | 9940        | local populations  | Morocco        |
| MOOA-U14-1068 | ERS154814        | SAMEA2012600  | NEXTGEN         | Ovis aries      | 9940        | D'man              | Morocco        |
| MOOA-W8-2287  | ERS154838        | SAMEA2012853  | NEXTGEN         | Ovis aries      | 9940        | Beni Guil          | Morocco        |
| MOOA-X11-1023 | ERS154834        | SAMEA2012849  | NEXTGEN         | Ovis aries      | 9940        | local populations  | Morocco        |
| MOOA-Z11-2196 | ERS154856        | SAMEA2012920  | NEXTGEN         | Ovis aries      | 9940        | Ouled Djellal      | Morocco        |
| MOOA-Z9-2154  | ERS154861        | SAMEA2012925  | NEXTGEN         | Ovis aries      | 9940        | Ouled Djellal      | Morocco        |
| OARI_BCS3     | SRS335706        | SAMN01000774  | ISGC            | Ovis aries      | 9940        | Brazilian Creole   | Americas       |
| OARI_BMN4     | SRS335671        | SAMN01000739  | ISGC            | Ovis aries      | 9940        | Morada Nova        | Americas       |
| OARI_BS14     | SRS335670        | SAMN01000738  | ISGC            | Ovis aries      | 9940        | Santa Inês         | Americas       |
| OARI_CAS3     | SRS335688        | SAMN01000756  | ISGC            | Ovis aries      | 9940        | Castellana         | SW Europe      |
| OARI_FIN1     | SRS335716        | SAMN01000784  | ISGC            | Ovis aries      | 9940        | Finnshoop          | orthern Europe |
| OARI_GAR4     | SRS335736        | SAMN01000804  | ISGC            | Ovis aries      | 9940        | Indian Garole      | Asia           |
| OARI_GCN5     | SRS335738        | SAMN01000806  | ISGC            | Ovis aries      | 9940        | Gulf Coast native  | Americas       |
| OARI_KRS5     | SRS335681        | SAMN01000749  | ISGC            | Ovis aries      | 9940        | Karakas            | SW Asia        |
| OARI_LAC1     | SRS335682        | SAMN01000750  | ISGC            | Ovis aries      | 9940        | Meat Lacaune       | SW Europe      |
| OARI_LAC84    | SRS335683        | SAMN01000751  | ISGC            | Ovis aries      | 9940        | Mmilk Lacaune      | SW Europe      |
| OARI_MER454   | SRS335684        | SAMN01000752  | ISGC            | Ovis aries      | 9940        | Merino             | SW Europe      |
| OARI_MERC1    | SRS335700        | SAMN01000768  | ISGC            | Ovis aries      | 9940        | Merino             | SW Europe      |
| OARI_NDZ1     | SRS335721        | SAMN01000789  | ISGC            | Ovis aries      | 9940        | Norduz             | SW Asia        |
| OARI_SALA2    | SRS335674        | SAMN01000742  | ISGC            | Ovis aries      | 9940        | Salz               | .              |
| OARI_SBF454   | SRS335676        | SAMN01000744  | ISGC            | Ovis aries      | 9940        | Scottish Blackface | orthern Europe |
| OARI_SUM2     | SRS335713        | SAMN01000781  | ISGC            | Ovis aries      | 9940        | Sumatra            | Asia           |
| OARI_VBS2     | SRS335694        | SAMN01000762  | ISGC            | Ovis aries      | 9940        | Valais Blacknose   | Central Europe |
| OCAN_OCAN1    | SRS335678        | SAMN01000746  | ISGC            | Ovis canadensis | 37174       | Ovis canadensis    | .              |
| OCAN_OCAN2    | SRS335680        | SAMN01000748  | ISGC            | Ovis canadensis | 37174       | Ovis canadensis    | .              |
| OCAN_OCAN3    | SRS335679        | SAMN01000747  | ISGC            | Ovis canadensis | 37174       | Ovis canadensis    | .              |
| ODAL_ODAL1    | SRS335696        | SAMN01000764  | ISGC            | Ovis dalli      | 9943        | Ovis dalli         | .              |
| ODAL_ODAL2    | SRS335717        | SAMN01000785  | ISGC            | Ovis dalli      | 9943        | Ovis dalli         | .              |
