# Supplementary material
Source: PubMed Central journal article supplement (PMC6327021)
Supplement: 41437_2018_112_MOESM7_ESM.pdf [file 41437_2018_112_MOESM7_ESM.pdf]

**TABLE S2.** Summary of information used to validate the enJSRV insertion scan procedure.

| enJSRV    | amorces                   |                         | Position OAR v4.0                        | Detected by Whole Genome Survey |
|-----------|---------------------------|-------------------------|------------------------------------------|---------------------------------|
|           | Forward                   | Reverse                 |                                          |                                 |
| enJSRV-6  | ccagttccagaaggaaggag      | caggggaataactggtgctacct | 1:239929928-239926832                    | Y                               |
| enJSRV-7  | tgtcacacgtggtgggagtc      | actcgagaggaagcagagggtc  | (multiple locus amplified)               | N                               |
| enJSRV-8  | tcagtggatcaatggtctgca     | tgggtgagcatgcacacag     | 3:139105810-139106319                    | Y                               |
| enJSRV-15 | gtgggaagaattccttggtacac   | ccataaggggtgtatcgtctgca | (Sequence not detected)                  | N                               |
| enJSRV-16 | tgctcagttcccaggtccca      | gtgcaagagctagagctggaagg | UnplacedScaffold_004083582.1:13920-14138 | Y                               |
| enJSRV-18 | gggaagattcgtttcttaggcgctc | atgaaccggactccatggcag   | 11:32040949-32041591                     | Y                               |
| enJSF16   | ggataagctacactataaaaccaag | ccatatgtaggattgggggtg   | 15:42218266-42211217                     | Y                               |
