# Supplementary material
Source: PubMed Central journal article supplement (PMC6327021)
Supplement: 41437_2018_112_MOESM8_ESM.pdf [file 41437_2018_112_MOESM8_ESM.pdf]

Table S3: Number of reads mapped on JSRV that also also map on an other  
Betaretrovirus

| Accession Number | Name                                    | # of reads |
|------------------|-----------------------------------------|------------|
| NC_001494.1      | Jaagsiekte sheep retrovirus             | 4624       |
| NC_007015.1      | Ovine enzootic nasal tumour virus       | 3117       |
| NC_004994.2      | Enzootic nasal tumour virus of goats    | 2674       |
| NC_001550.1      | Mason-Pfizer monkey virus               | 3          |
| NC_029852.1      | Bovine retrovirus CH15                  | 0          |
| NC_027117.1      | Desmodus rotundus endogenous retrovirus | 0          |
| NC_001503.1      | Mouse mammary tumor virus               | 0          |
| NC_001514.1      | Squirrel monkey retrovirus              | 0          |
| NC_014474.1      | Simian retrovirus 4                     | 0          |
| NC_031326.1      | Simian retrovirus 8                     | 0          |
