# Supplementary material
Source: PubMed Central journal article supplement (PMC6327021)
Supplement: 41437_2018_112_MOESM9_ESM.pdf [file 41437_2018_112_MOESM9_ESM.pdf]

**TABLE S4.** putative positions of enJSRVs distribution along chromosomes

| <b>Chromosome</b> | <b>Start</b> | <b>Stop</b> |
|-------------------|--------------|-------------|
| 1                 | 342          | 639         |
| 1                 | 2205879      | 2207196     |
| 1                 | 14384701     | 14384836    |
| 1                 | 37717873     | 37718219    |
| 1                 | 43856484     | 43857177    |
| 1                 | 57059277     | 57060170    |
| 1                 | 57193894     | 57194075    |
| 1                 | 67591577     | 67591695    |
| 1                 | 67917957     | 67918857    |
| 1                 | 88525704     | 88525910    |
| 1                 | 100177541    | 100178031   |
| 1                 | 101531283    | 101532174   |
| 1                 | 110124268    | 110124408   |
| 1                 | 110263276    | 110263474   |
| 1                 | 120684708    | 120685538   |
| 1                 | 121300002    | 121300139   |
| 1                 | 123844156    | 123844338   |
| 1                 | 125907498    | 125907620   |
| 1                 | 126354935    | 126355308   |
| 1                 | 129345396    | 129346155   |
| 1                 | 141667485    | 141667680   |
| 1                 | 153680801    | 153681018   |
| 1                 | 167653959    | 167654268   |
| 1                 | 176116007    | 176117307   |
| 1                 | 185111597    | 185112429   |
| 1                 | 186979733    | 186980689   |
| 1                 | 188119890    | 188120306   |
| 1                 | 192148370    | 192149100   |
| 1                 | 198528740    | 198528956   |
| 1                 | 200333820    | 200334198   |
| 1                 | 210472404    | 210472641   |
| 1                 | 214110346    | 214111402   |
| 1                 | 218916724    | 218916906   |
| 1                 | 222227096    | 222227380   |
| 1                 | 223161909    | 223162608   |
| 1                 | 233159705    | 233161286   |
| 1                 | 233623777    | 233624453   |
| 1                 | 239700322    | 239701283   |
| 1                 | 239924941    | 239930218   |
| 1                 | 248163897    | 248164833   |
| 1                 | 253585865    | 253587353   |
| 1                 | 264331689    | 264332073   |
| 1                 | 268322867    | 268323216   |
| 1                 | 270038023    | 270038249   |
| 2                 | 5598443      | 5598576     |

|   |           |           |
|---|-----------|-----------|
| 2 | 22893847  | 22894449  |
| 2 | 30029537  | 30029780  |
| 2 | 37783110  | 37783587  |
| 2 | 41010075  | 41010427  |
| 2 | 62201200  | 62202028  |
| 2 | 62637353  | 62637461  |
| 2 | 64185165  | 64185284  |
| 2 | 70700842  | 70701233  |
| 2 | 72243833  | 72244031  |
| 2 | 78555763  | 78555917  |
| 2 | 79424743  | 79424924  |
| 2 | 80143849  | 80144423  |
| 2 | 88969215  | 88969522  |
| 2 | 92714889  | 92716243  |
| 2 | 93868997  | 93869107  |
| 2 | 105835597 | 105835951 |
| 2 | 137474462 | 137474704 |
| 2 | 137769423 | 137769567 |
| 2 | 140646171 | 140646904 |
| 2 | 164826311 | 164826436 |
| 2 | 165751902 | 165752550 |
| 2 | 170493291 | 170493730 |
| 2 | 173047129 | 173047554 |
| 2 | 174526102 | 174526762 |
| 2 | 185298227 | 185298488 |
| 2 | 192813156 | 192813337 |
| 2 | 196599818 | 196600413 |
| 2 | 199868504 | 199869102 |
| 2 | 202012987 | 202013360 |
| 2 | 202026037 | 202026537 |
| 2 | 209102491 | 209103442 |
| 2 | 221859647 | 221860026 |
| 2 | 223807837 | 223808755 |
| 2 | 224857243 | 224857983 |
| 2 | 240619718 | 240620642 |
| 3 | 9329933   | 9330100   |
| 3 | 39186126  | 39195498  |
| 3 | 39574854  | 39575953  |
| 3 | 48394403  | 48395059  |
| 3 | 53562177  | 53563626  |
| 3 | 53672831  | 53673582  |
| 3 | 53720670  | 53720839  |
| 3 | 54152338  | 54152464  |
| 3 | 54681942  | 54682743  |
| 3 | 55447772  | 55448277  |
| 3 | 61509401  | 61509781  |
| 3 | 71396208  | 71396504  |
| 3 | 79081810  | 79082366  |
| 3 | 88725088  | 88725419  |
| 3 | 97794805  | 97795019  |

|   |           |           |
|---|-----------|-----------|
| 3 | 100574634 | 100575018 |
| 3 | 116512522 | 116512982 |
| 3 | 117447687 | 117448152 |
| 3 | 119600616 | 119601166 |
| 3 | 123271753 | 123271880 |
| 3 | 131375845 | 131376194 |
| 3 | 131971918 | 131972455 |
| 3 | 150242656 | 150242853 |
| 3 | 151579466 | 151581898 |
| 3 | 154289872 | 154290161 |
| 3 | 182331929 | 182332744 |
| 3 | 182488558 | 182489731 |
| 3 | 192140869 | 192141026 |
| 3 | 208008872 | 208009059 |
| 3 | 210708657 | 210709487 |
| 4 | 494978    | 495078    |
| 4 | 12499965  | 12500560  |
| 4 | 20187309  | 20187763  |
| 4 | 24268081  | 24268316  |
| 4 | 29570695  | 29570870  |
| 4 | 29581486  | 29581833  |
| 4 | 29795041  | 29795282  |
| 4 | 31710120  | 31710731  |
| 4 | 34617114  | 34617910  |
| 4 | 39333289  | 39334026  |
| 4 | 40461352  | 40462280  |
| 4 | 48933475  | 48934365  |
| 4 | 49466400  | 49466557  |
| 4 | 58425562  | 58426328  |
| 4 | 61512008  | 61512190  |
| 4 | 62950672  | 62950871  |
| 4 | 70715644  | 70715869  |
| 4 | 77382933  | 77383791  |
| 4 | 84885218  | 84885920  |
| 4 | 87757497  | 87757613  |
| 4 | 110929300 | 110929939 |
| 4 | 119106962 | 119107190 |
| 5 | 2245220   | 2245329   |
| 5 | 3337947   | 3339051   |
| 5 | 6254426   | 6254769   |
| 5 | 7712478   | 7717661   |
| 5 | 8556834   | 8557511   |
| 5 | 17652410  | 17652755  |
| 5 | 25191266  | 25191724  |
| 5 | 31588136  | 31588423  |
| 5 | 32859808  | 32860389  |
| 5 | 34453325  | 34453478  |
| 5 | 34532466  | 34532758  |
| 5 | 41689666  | 41690047  |
| 5 | 45136894  | 45138484  |

|   |           |           |
|---|-----------|-----------|
| 5 | 49158918  | 49159101  |
| 5 | 56429867  | 56430303  |
| 5 | 61146356  | 61147585  |
| 5 | 61546003  | 61546166  |
| 5 | 65403799  | 65404400  |
| 5 | 71849837  | 71850193  |
| 5 | 74760148  | 74760777  |
| 5 | 83919859  | 83920710  |
| 5 | 86914702  | 86915038  |
| 5 | 93777799  | 93778038  |
| 5 | 93943311  | 93943958  |
| 5 | 94060618  | 94061471  |
| 5 | 94954928  | 94955431  |
| 5 | 99403130  | 99403273  |
| 5 | 107785561 | 107785761 |
| 6 | 3909611   | 3909877   |
| 6 | 5407826   | 5408627   |
| 6 | 9284715   | 9285367   |
| 6 | 10564342  | 10564581  |
| 6 | 10752461  | 10753041  |
| 6 | 12716680  | 12717339  |
| 6 | 12968927  | 12970271  |
| 6 | 13860124  | 13860527  |
| 6 | 15864048  | 15864153  |
| 6 | 26903030  | 26903347  |
| 6 | 44111200  | 44111348  |
| 6 | 54758386  | 54759077  |
| 6 | 59522738  | 59523456  |
| 6 | 63100958  | 63102002  |
| 6 | 67900058  | 67901549  |
| 6 | 91264533  | 91265051  |
| 6 | 115251702 | 115253046 |
| 7 | 16069121  | 16069287  |
| 7 | 16800216  | 16801160  |
| 7 | 22564532  | 22565074  |
| 7 | 23552547  | 23552709  |
| 7 | 31323220  | 31323369  |
| 7 | 35925425  | 35926538  |
| 7 | 42270045  | 42270223  |
| 7 | 46770191  | 46770875  |
| 7 | 47180532  | 47180829  |
| 7 | 47717322  | 47717815  |
| 7 | 51680986  | 51681311  |
| 7 | 52791858  | 52792682  |
| 7 | 65962454  | 65962654  |
| 7 | 66193144  | 66193393  |
| 7 | 69512154  | 69512978  |
| 7 | 70225681  | 70225881  |
| 7 | 82525096  | 82525384  |
| 7 | 84282139  | 84282420  |

|    |          |          |
|----|----------|----------|
| 8  | 762798   | 763312   |
| 8  | 4266341  | 4266467  |
| 8  | 5477298  | 5477671  |
| 8  | 6601534  | 6601715  |
| 8  | 6791797  | 6792086  |
| 8  | 7805026  | 7805638  |
| 8  | 11545439 | 11546171 |
| 8  | 13114725 | 13116194 |
| 8  | 13144610 | 13144806 |
| 8  | 15554617 | 15555445 |
| 8  | 21067792 | 21068150 |
| 8  | 26395548 | 26395679 |
| 8  | 31964735 | 31966191 |
| 8  | 42025182 | 42025521 |
| 8  | 42833095 | 42833246 |
| 8  | 49447089 | 49452035 |
| 8  | 52141755 | 52142010 |
| 8  | 58040696 | 58042435 |
| 8  | 58230403 | 58230661 |
| 8  | 62883886 | 62884086 |
| 8  | 69871446 | 69871546 |
| 9  | 1335132  | 1335646  |
| 9  | 10396888 | 10397060 |
| 9  | 11582255 | 11582477 |
| 9  | 22596749 | 22597569 |
| 9  | 30339085 | 30339764 |
| 9  | 47826153 | 47826260 |
| 9  | 47986582 | 47992598 |
| 9  | 48069202 | 48069435 |
| 9  | 48085756 | 48086199 |
| 9  | 50560132 | 50560493 |
| 9  | 51282785 | 51283023 |
| 9  | 58298367 | 58298995 |
| 9  | 60543405 | 60543645 |
| 9  | 68283882 | 68284577 |
| 9  | 74377327 | 74377509 |
| 9  | 89616074 | 89616425 |
| 9  | 93749753 | 93751200 |
| 10 | 647010   | 647635   |
| 10 | 16003412 | 16004140 |
| 10 | 18084299 | 18085221 |
| 10 | 18685131 | 18686087 |
| 10 | 21617729 | 21617890 |
| 10 | 25832743 | 25833387 |
| 10 | 29588207 | 29589131 |
| 10 | 42138555 | 42139995 |
| 10 | 47691830 | 47692284 |
| 10 | 56177117 | 56177482 |
| 10 | 70818749 | 70818892 |
| 10 | 70875412 | 70875672 |

|    |          |          |
|----|----------|----------|
| 10 | 74044429 | 74044539 |
| 10 | 75754428 | 75754614 |
| 10 | 79300547 | 79300775 |
| 10 | 83982083 | 83982720 |
| 10 | 84860626 | 84861247 |
| 11 | 28240905 | 28242188 |
| 11 | 32040573 | 32049553 |
| 11 | 37169037 | 37169726 |
| 11 | 37275426 | 37275626 |
| 11 | 37288586 | 37288848 |
| 11 | 39691484 | 39691648 |
| 11 | 53828077 | 53828457 |
| 11 | 58645670 | 58645801 |
| 11 | 58760228 | 58760944 |
| 12 | 1817176  | 1818635  |
| 12 | 3051196  | 3051882  |
| 12 | 3379651  | 3380810  |
| 12 | 4212217  | 4213191  |
| 12 | 12223631 | 12223761 |
| 12 | 20120926 | 20121787 |
| 12 | 21411994 | 21412760 |
| 12 | 25451474 | 25451935 |
| 12 | 54127796 | 54127968 |
| 12 | 55909805 | 55910005 |
| 12 | 61869488 | 61874567 |
| 12 | 69295656 | 69295840 |
| 12 | 71813569 | 71814164 |
| 13 | 4613535  | 4614205  |
| 13 | 5660528  | 5660822  |
| 13 | 10166106 | 10166457 |
| 13 | 11624541 | 11624679 |
| 13 | 14374019 | 14375234 |
| 13 | 15369608 | 15370479 |
| 13 | 16657853 | 16658356 |
| 13 | 16923769 | 16925070 |
| 13 | 26668709 | 26669011 |
| 13 | 26802177 | 26804085 |
| 13 | 37028781 | 37028902 |
| 13 | 37473254 | 37474460 |
| 13 | 42751972 | 42752630 |
| 13 | 51646054 | 51646354 |
| 13 | 65538088 | 65538800 |
| 13 | 65912334 | 65913023 |
| 13 | 66757785 | 66757987 |
| 13 | 66805801 | 66806368 |
| 13 | 71396838 | 71397780 |
| 13 | 73488152 | 73488299 |
| 14 | 3856048  | 3856908  |
| 14 | 13773683 | 13780959 |
| 14 | 14971659 | 14980135 |

|    |          |          |
|----|----------|----------|
| 14 | 15223892 | 15224121 |
| 14 | 16361403 | 16361881 |
| 14 | 38663513 | 38664335 |
| 14 | 44115742 | 44115868 |
| 14 | 49408238 | 49409612 |
| 14 | 50398708 | 50398990 |
| 14 | 52017299 | 52017499 |
| 14 | 55968772 | 55969680 |
| 14 | 56091086 | 56091274 |
| 14 | 56130210 | 56130428 |
| 14 | 57477208 | 57478067 |
| 14 | 57501294 | 57509925 |
| 14 | 57938885 | 57939519 |
| 14 | 59600134 | 59600248 |
| 15 | 38451168 | 38451300 |
| 15 | 42210989 | 42218388 |
| 15 | 44088138 | 44089566 |
| 15 | 46872217 | 46873045 |
| 15 | 53278089 | 53278204 |
| 15 | 60727882 | 60728229 |
| 15 | 75925987 | 75926108 |
| 15 | 76228047 | 76228225 |
| 15 | 76378592 | 76378792 |
| 16 | 3014416  | 3015130  |
| 16 | 5469289  | 5470177  |
| 16 | 6306642  | 6307224  |
| 16 | 25168923 | 25169204 |
| 16 | 31490866 | 31491325 |
| 16 | 31606724 | 31607033 |
| 16 | 31637575 | 31638584 |
| 16 | 37880919 | 37881875 |
| 16 | 49444446 | 49445003 |
| 16 | 49827306 | 49827643 |
| 16 | 50083698 | 50084419 |
| 16 | 67340837 | 67343461 |
| 16 | 67429063 | 67429214 |
| 17 | 4799548  | 4799935  |
| 17 | 24180310 | 24180483 |
| 17 | 24476595 | 24476909 |
| 17 | 24952057 | 24952255 |
| 17 | 26386142 | 26386299 |
| 17 | 31340912 | 31341665 |
| 17 | 37652428 | 37653197 |
| 17 | 39306448 | 39306959 |
| 17 | 40515405 | 40515647 |
| 17 | 49320735 | 49320874 |
| 17 | 70266242 | 70266410 |
| 18 | 1745731  | 1746577  |
| 18 | 11313776 | 11314646 |
| 18 | 16031940 | 16032335 |

|    |          |          |
|----|----------|----------|
| 18 | 20421369 | 20421533 |
| 18 | 45540229 | 45540450 |
| 18 | 49039604 | 49040011 |
| 18 | 50745977 | 50746816 |
| 18 | 51648143 | 51648305 |
| 18 | 59484167 | 59484271 |
| 18 | 60858720 | 60858855 |
| 18 | 63585684 | 63586276 |
| 18 | 67684215 | 67684835 |
| 19 | 216298   | 217044   |
| 19 | 16088646 | 16089816 |
| 19 | 40146810 | 40147510 |
| 19 | 42778494 | 42778746 |
| 19 | 52693205 | 52698033 |
| 19 | 56858629 | 56859268 |
| 20 | 439875   | 440708   |
| 20 | 8078714  | 8079957  |
| 20 | 10560277 | 10560448 |
| 20 | 24548420 | 24548603 |
| 20 | 25894311 | 25895216 |
| 20 | 27503439 | 27512324 |
| 20 | 27644831 | 27645035 |
| 20 | 27681519 | 27682215 |
| 20 | 29086233 | 29086861 |
| 20 | 29134959 | 29135562 |
| 20 | 29373765 | 29374538 |
| 20 | 29803622 | 29805080 |
| 20 | 30009950 | 30010084 |
| 20 | 30939896 | 30940223 |
| 20 | 31625205 | 31625393 |
| 20 | 39882607 | 39882894 |
| 20 | 44049314 | 44049592 |
| 20 | 48822223 | 48824333 |
| 21 | 6670613  | 6673917  |
| 21 | 9453275  | 9453971  |
| 21 | 26305784 | 26306380 |
| 21 | 38172977 | 38173101 |
| 21 | 38826302 | 38827077 |
| 21 | 40635749 | 40635938 |
| 22 | 4210324  | 4210623  |
| 22 | 16472241 | 16472356 |
| 22 | 25223297 | 25223959 |
| 22 | 33186290 | 33186404 |
| 23 | 2167537  | 2167990  |
| 23 | 7944860  | 7945077  |
| 23 | 16500828 | 16502291 |
| 23 | 20365671 | 20365981 |
| 23 | 26993479 | 26994305 |
| 23 | 33759588 | 33759808 |
| 23 | 37782226 | 37782808 |



|                              |           |           |
|------------------------------|-----------|-----------|
| 23                           | 46951814  | 46953083  |
| 23                           | 62173878  | 62173998  |
| 24                           | 5838772   | 5839243   |
| 24                           | 9079889   | 9081007   |
| 24                           | 9696720   | 9696925   |
| 24                           | 10000606  | 10001303  |
| 24                           | 17847402  | 17847597  |
| 24                           | 19785012  | 19785833  |
| 24                           | 26936023  | 26936191  |
| 25                           | 12919655  | 12919981  |
| 25                           | 19012317  | 19012959  |
| 25                           | 22399435  | 22399745  |
| 25                           | 23373665  | 23373832  |
| 25                           | 25140637  | 25141145  |
| 25                           | 27882202  | 27882550  |
| 25                           | 37835974  | 37837470  |
| 26                           | 6217951   | 6218700   |
| 26                           | 8240712   | 8241365   |
| 26                           | 22834694  | 22835611  |
| 26                           | 26203038  | 26204564  |
| 26                           | 29143308  | 29143872  |
| 26                           | 39733535  | 39734340  |
| X                            | 410747    | 412151    |
| X                            | 854922    | 855027    |
| X                            | 1839426   | 1840180   |
| X                            | 6767081   | 6767711   |
| X                            | 15662387  | 15662647  |
| X                            | 23137844  | 23138163  |
| X                            | 24058816  | 24059051  |
| X                            | 25613659  | 25613933  |
| X                            | 38550273  | 38552731  |
| X                            | 48250470  | 48251866  |
| X                            | 68808481  | 68809297  |
| X                            | 78053684  | 78054013  |
| X                            | 80796664  | 80798020  |
| X                            | 94485352  | 94485669  |
| X                            | 94701774  | 94702431  |
| X                            | 105056320 | 105057753 |
| X                            | 110305261 | 110306549 |
| X                            | 113448410 | 113449223 |
| X                            | 125917159 | 125925275 |
| X                            | 132518091 | 132518197 |
| X                            | 132532853 | 132533798 |
| UnplacedScaffold_004080257.1 | 11568     | 11784     |
| Unplaced_Contig646_fixed     | 88        | 329       |
| UnplacedScaffold_004080949.1 | 5887      | 6361      |
| UnplacedScaffold_004080951.1 | 871       | 1616      |
| UnplacedScaffold_004081385.1 | 13936     | 14136     |
| Unplaced_Contig2508_fixed    | 1848      | 2062      |
| Unplaced_Contig2542_fixed    | 1632      | 2082      |

|                              |       |       |
|------------------------------|-------|-------|
| UnplacedScaffold_004081482.1 | 52    | 3365  |
| UnplacedScaffold_004081513.1 | 36197 | 36587 |
| UnplacedScaffold_004081611.1 | 5105  | 5750  |
| UnplacedScaffold_004081704.1 | 38852 | 39202 |
| UnplacedScaffold_004082124.1 | 90    | 127   |
| UnplacedScaffold_004082173.1 | 896   | 6590  |
| UnplacedScaffold_004082437.1 | 4298  | 4735  |
| UnplacedScaffold_004082547.1 | 26498 | 27063 |
| UnplacedScaffold_004082613.1 | 385   | 680   |
| UnplacedScaffold_004082672.1 | 1821  | 3366  |
| UnplacedScaffold_004082774.1 | 6891  | 7023  |
| UnplacedScaffold_004082890.1 | 5819  | 6716  |
| UnplacedScaffold_004083582.1 | 13635 | 14355 |
| UnplacedScaffold_004083595.1 | 913   | 1083  |
| UnplacedScaffold_004085138.1 | 99    | 10866 |
| UnplacedScaffold_004085449.1 | 9790  | 9997  |
| Unplaced_Contig10233_fixed   | 798   | 1364  |

---
