# Supplementary material
Source: PubMed Central journal article supplement (PMC6327021)
Supplement: 41437_2018_112_MOESM10_ESM.pdf [file 41437_2018_112_MOESM10_ESM.pdf]

Table S5. Informations about mate-pairs reads with one mapped on the sequence flanking the 3' or 5' side of the insertion and the other carrying the protective mutation (in red).

| Read Name          | Library size | Mapping Quality | Mate Position        | Sequence                                                                                           |
|--------------------|--------------|-----------------|----------------------|----------------------------------------------------------------------------------------------------|
| ERR169319.205847.1 | 2900         | 60              | 5' flanking sequence | AAATATGGGACATAGGATATGCTGCTGATGTTGTTGCGATATGTTATCTGTAATGTTAAAGATGGGGCAATFAGTGTTFETAGACATAATYATCAATF |
| ERR169317.120576.6 | 8020         | 60              | 3' flanking sequence | TGTTTGTGATATGTTATCTGTAATGTTAAAGATGGGGCAATFAGTGTTFCTAAAGCTAAATYATCAATTTCTTTCATTCATGAGGAAGCTTGGCC    |
| ERR169327.1422824  | 8020         | 60              | 3' flanking sequence | TGTTTGTGATATGTTATCTGTAATGTTAAAGATGGGGCAATFAGTGTTFCTAAAGCTAAATYATCAATTTCTTTCATTCATGAGGAAGCTTGGCC    |
| ERR169327.1096925  | 8020         | 60              | 3' flanking sequence | TGTTTGTGATATGTTATCTGTAATGTTAAAGATGGGGCAATFAGTGTTFCTAAAGCTAAATYATCAATTTCTTTCATTCATGAGGAAGCTTGGCC    |
| ERR169327.1313124  | 8020         | 60              | 3' flanking sequence | TGTTTGTGATATGTTATCTGTAATGTTAAAGATGGGGCAATFAGTGTTFCTAAAGCTAAATYATCAATTTCTTTCATTCATGAGGAAGCTTGGCC    |
| ERR169317.4373880  | 8020         | 60              | 3' flanking sequence | GTTTGTGATATGTTATCTGTAATGTTAAAGATGGGGCAATFAGTGTTFCTAAAGCTAAATYATCAATTTCTTTCATTCATGAGGAAGCTTGGCC     |
