# Supplementary material
Source: PubMed Central journal article supplement (PMC6327021)

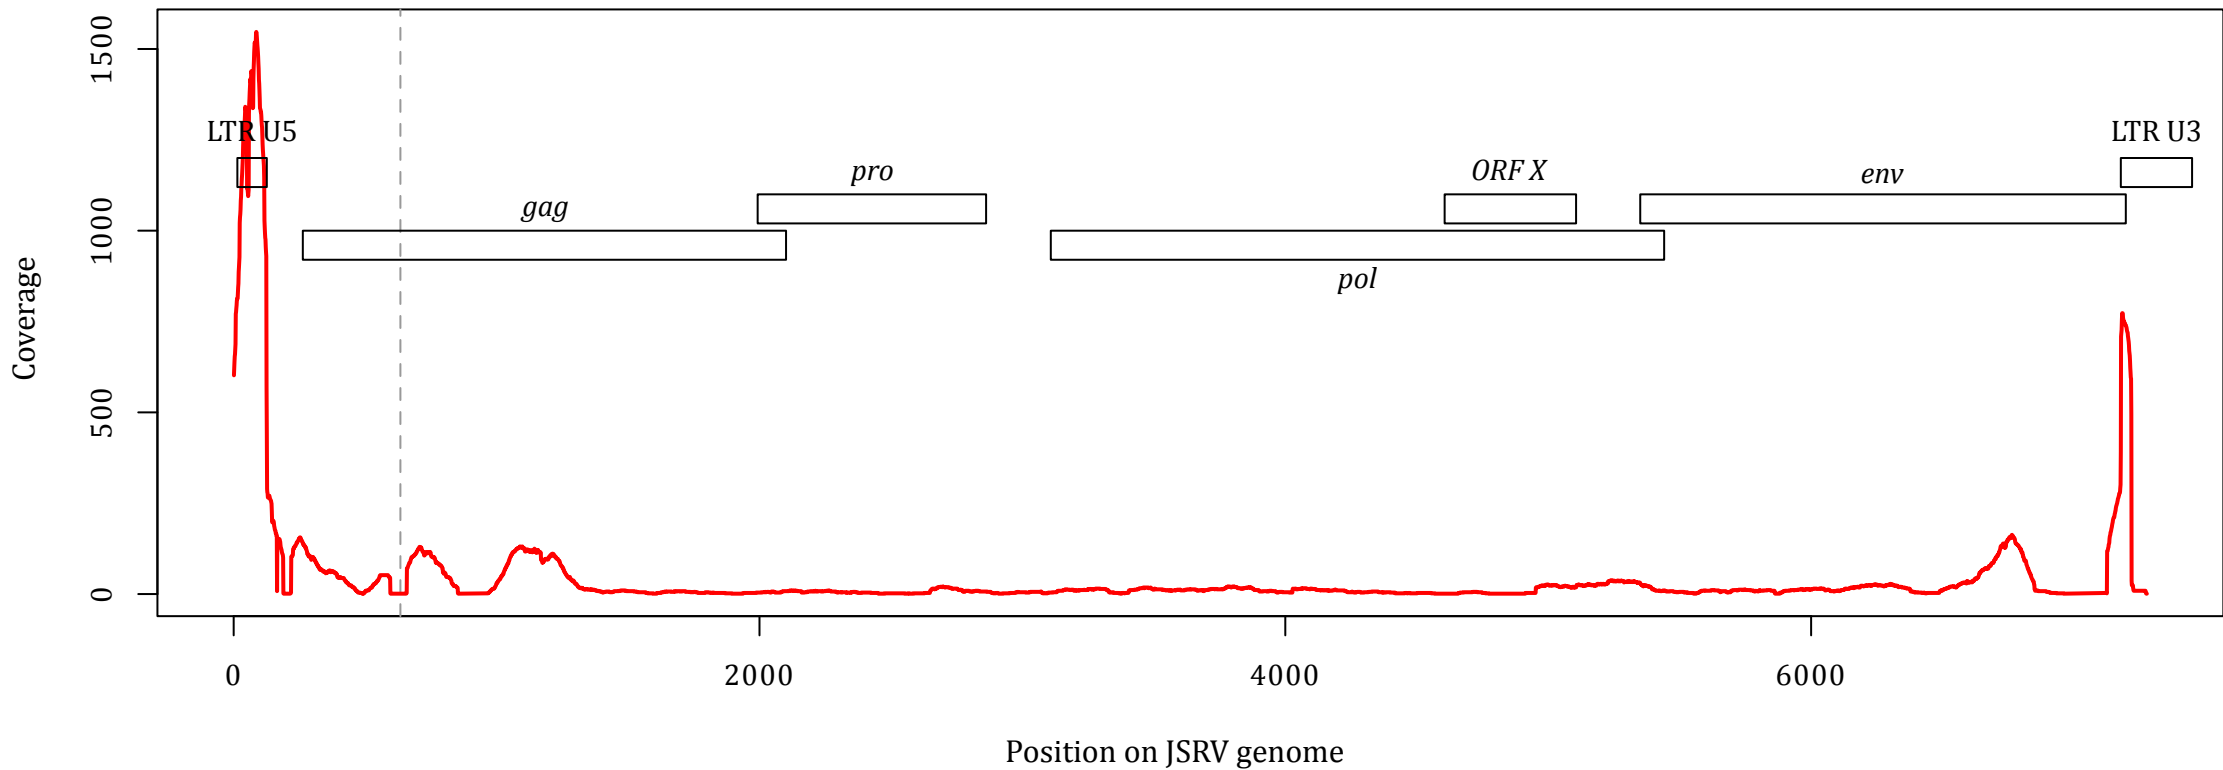

Supplement: 41437_2018_112_MOESM1_ESM.pdf [file 41437_2018_112_MOESM1_ESM.pdf]

A

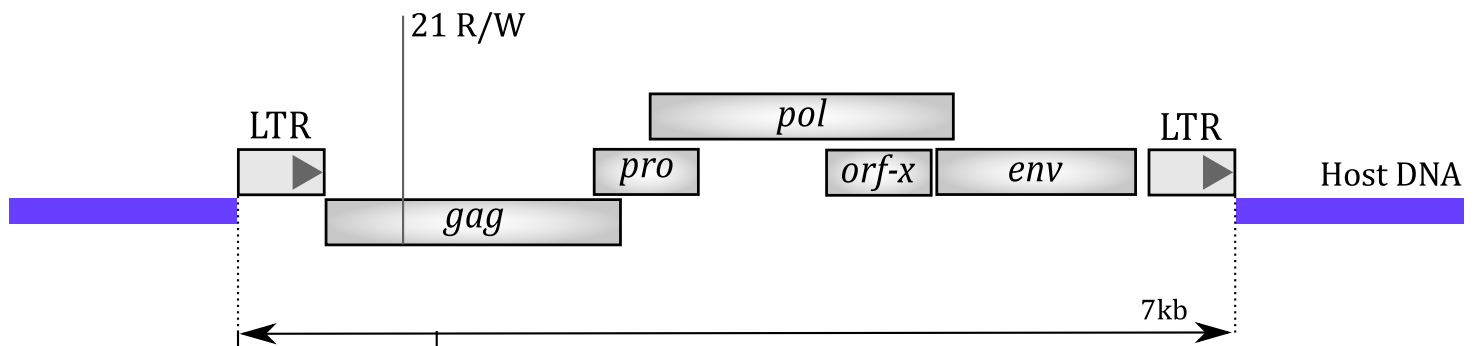

B

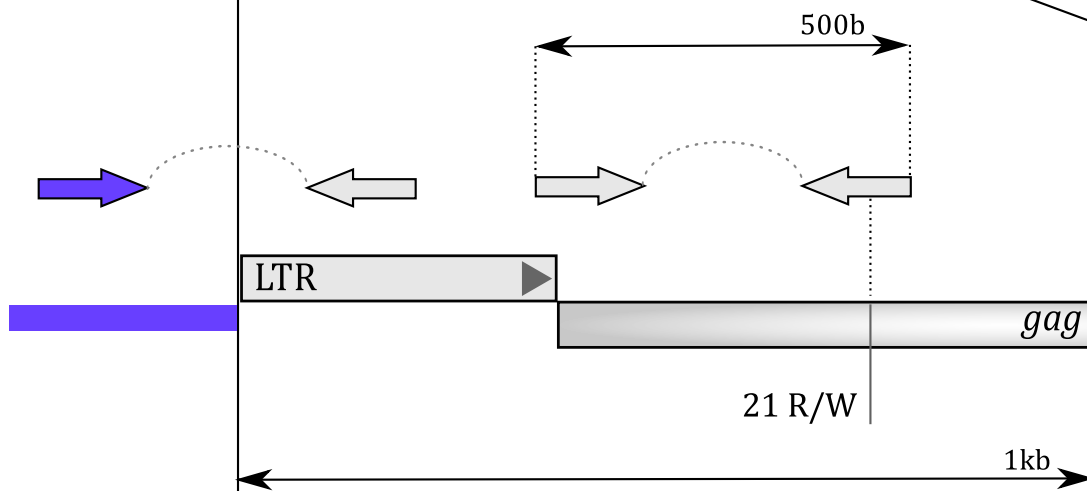

C

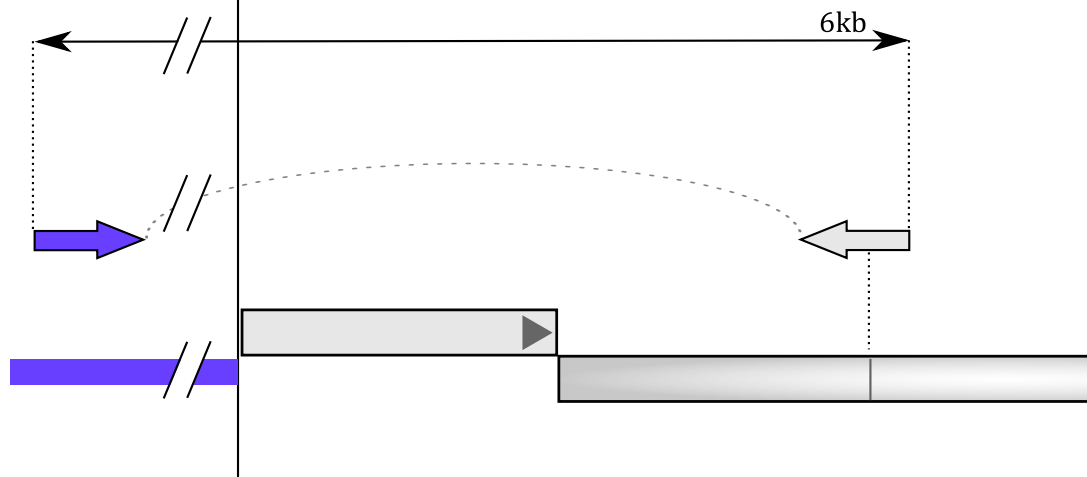

Supplement: 41437_2018_112_MOESM2_ESM.pdf [file 41437_2018_112_MOESM2_ESM.pdf]

# Chromosome map of enJSRVs

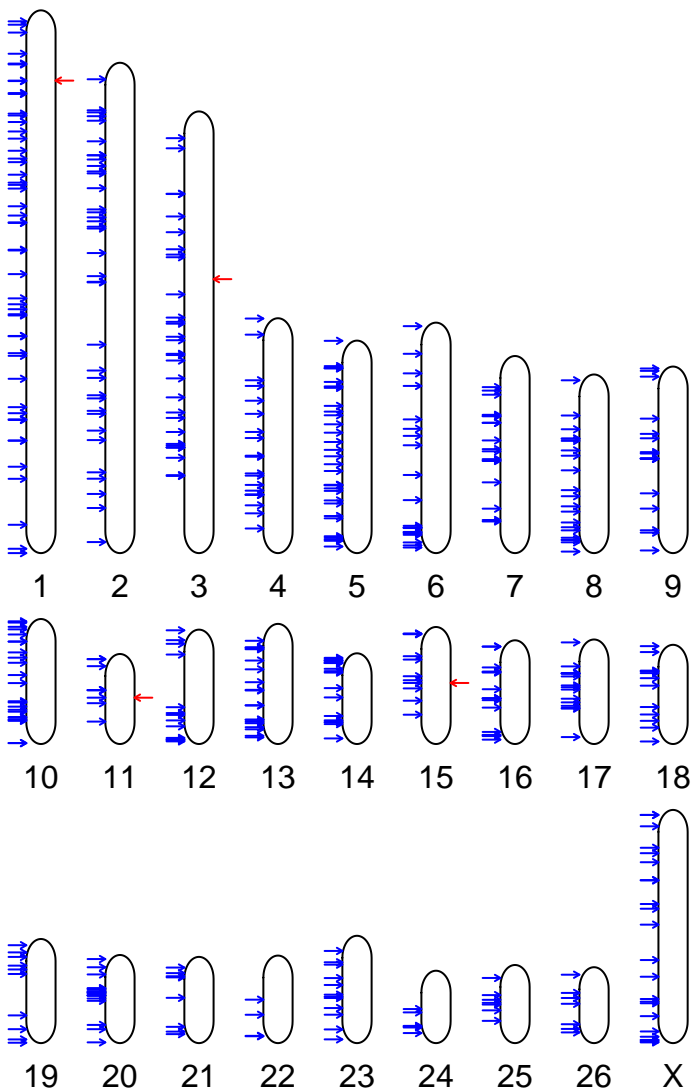

Supplement: 41437_2018_112_MOESM3_ESM.pdf [file 41437_2018_112_MOESM3_ESM.pdf]

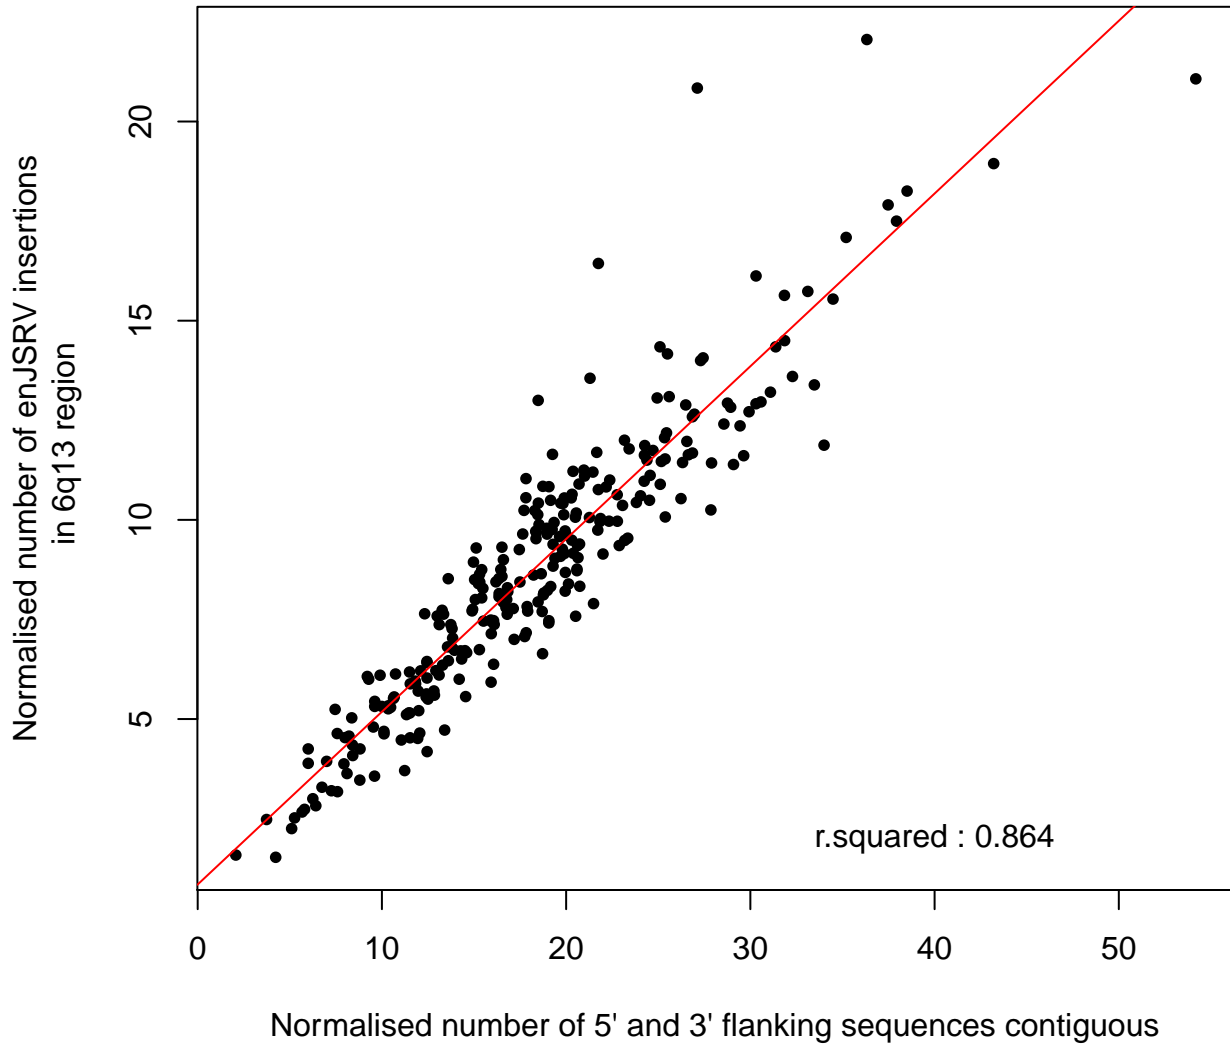

Supplement: 41437_2018_112_MOESM4_ESM.pdf [file 41437_2018_112_MOESM4_ESM.pdf]
